# Supplementary material
Source: PubMed Central journal article supplement (PMC10535011)
Supplement: jamasurg-e234532-s002.pdf [file jamasurg-e234532-s002.pdf]

## Data Sharing Statement

Chen. Case Sampling vs Universal Review for Evaluating Hospital Postoperative Mortality in US Surgical Quality Improvement Programs. *JAMA Surg.* Published September 27, 2023. doi:10.1001/jamasurg.2023.4532

### Data

**Data available:** No
